# Supplementary material for: Parent-Reported Use of Interventions by Toddlers and Preschoolers With Autism Spectrum Disorder
Source: Atypon-hosted journal article supplement (doi:10.1176/appi.ps.201600524), 2017-10-16
Supplement: appi.ps.201600524.ds001.pdf [file appi.ps.201600524.ds001.pdf]

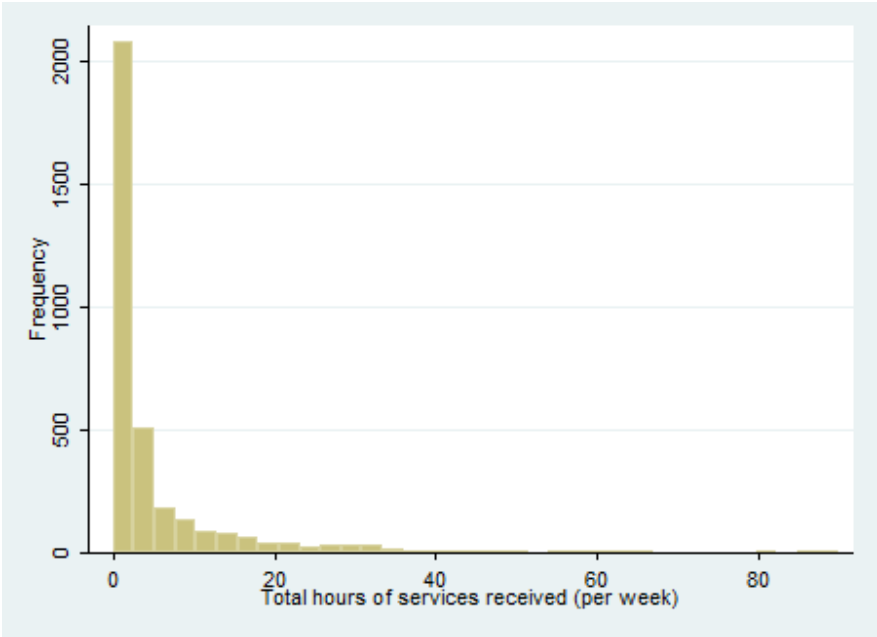

Distribution of total hours of services received at baseline visit.

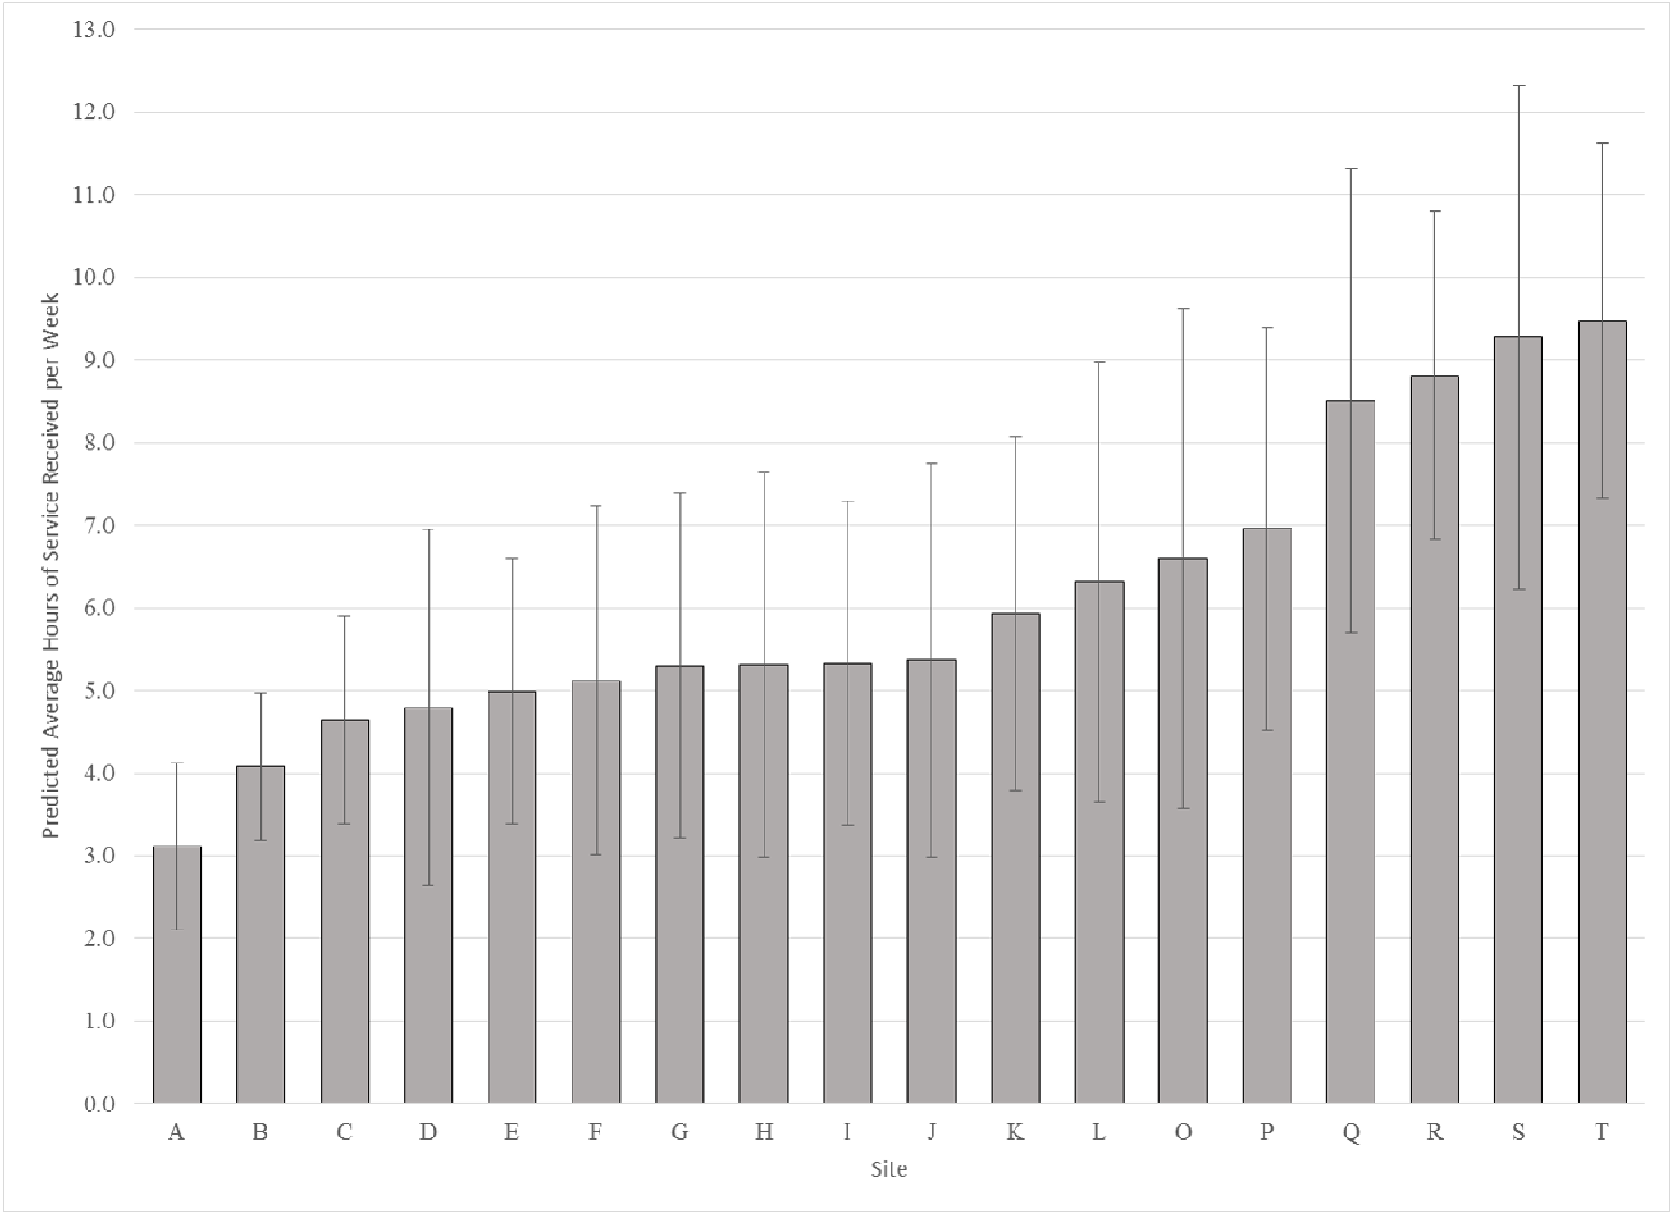

Predicted average hours of services (with standard deviation bars) by ATN/AIR-P sites
